# Supplementary material
Source: PubMed Central journal article supplement (PMC3077990)

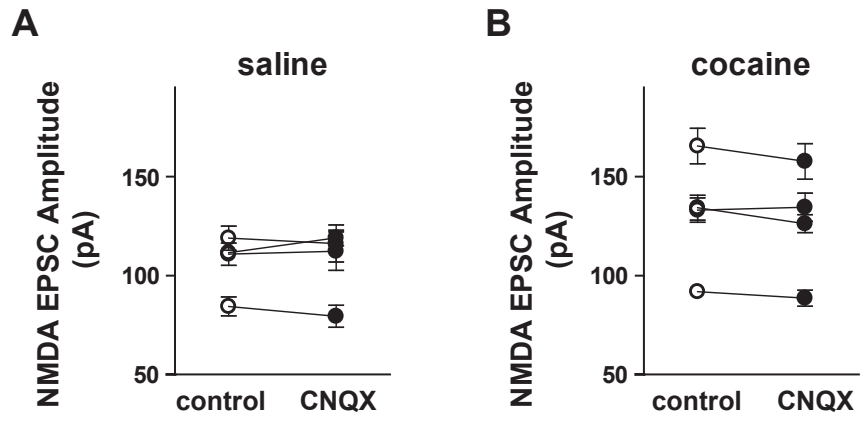

Supplement: NIHMS219953-supplement-Fig_1.pdf [file NIHMS219953-supplement-Fig_1.pdf]

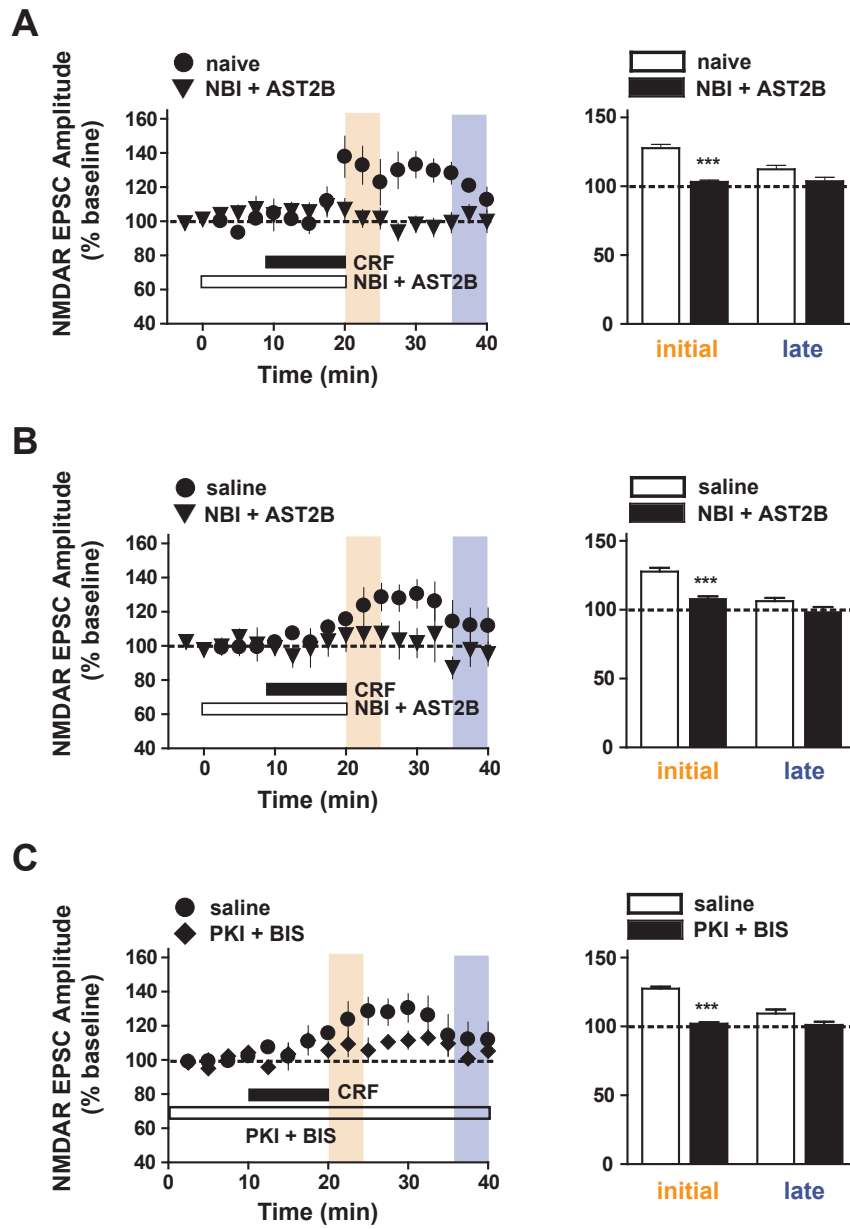

Hahn et al. Figure S2

Supplement: NIHMS219953-supplement-Fig_2.pdf [file NIHMS219953-supplement-Fig_2.pdf]

# 1 day cocaine

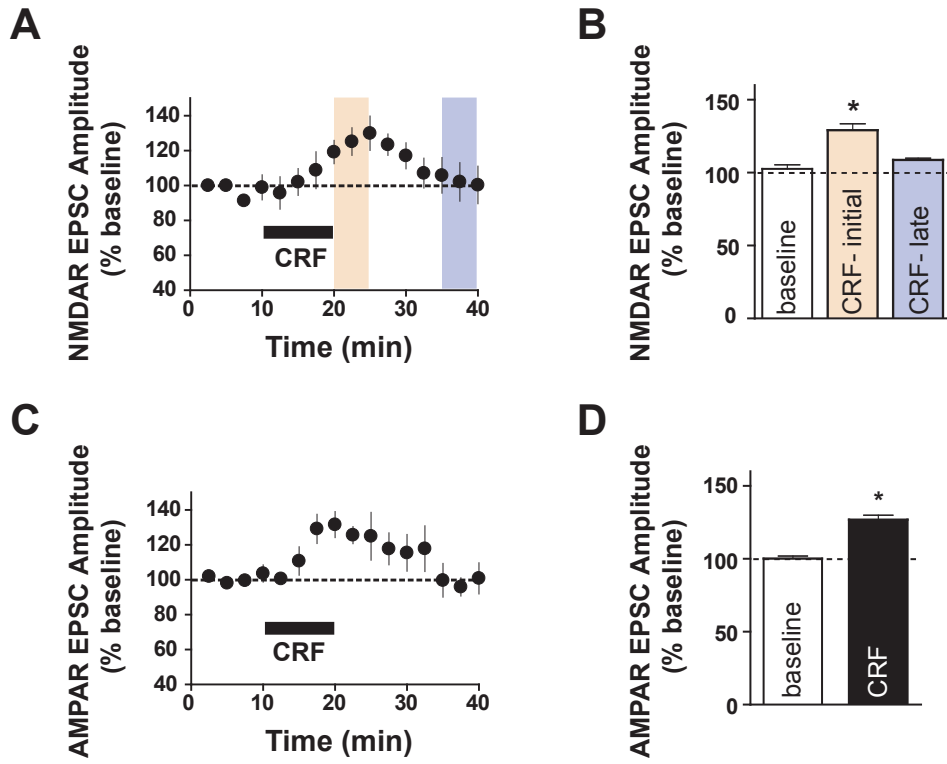

Supplement: NIHMS219953-supplement-Fig_3.pdf [file NIHMS219953-supplement-Fig_3.pdf]
